# Supplementary material
Source: publisher figshare collection journal article supplement (https://tandf.figshare.com/ndownloader/files/27567771)
Supplement: Supplementary file 1 [file 27567771]

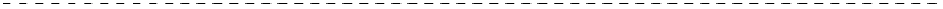

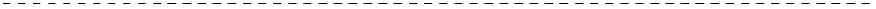

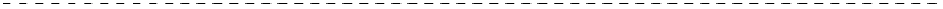

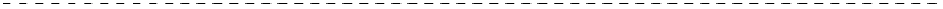

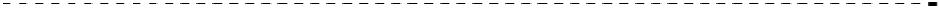

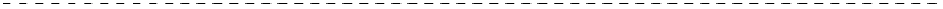

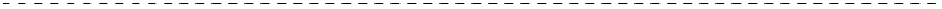

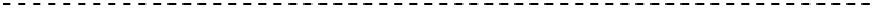

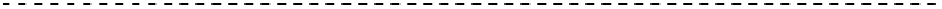
**Table S1.** Primer list of UPR downstream genes.

| Gene |  | PCR primer pairs [5’-3’] |
| --- | --- | --- |
| *Xbp1*.total (mouse) | F R | GACAGAGAGTCAAACTAACGTGG GTCCAGCAGGCAAGAAGGT |
| *Xbp1s* (mouse) | F R | AAGAACACGCTTGGGAATGG CTGCACCTGCTGCGGAC |
| *Dnajb6/ERdj4* (mouse) | F R | TAAAAGCCCTGATGCTGAAGC TCCGACTATTGGCATCCGA |
| *Hspa5/Grp78* (mouse) | F R | TCATCGGACGCACTTGGAA CAACCACCTTGAATGGCAAGA |
| *XBP1*.total (human) | F R | AGTAGCAGCTCAGACTGCCA CCTGGTTCTCAACTACAAGGC |
| *XBP1s* (human) | F R | CGC TTG GGG ATG GAT GCC CTG CCT GCA CCT GCT GCG GAC T |
| *DNAJB9/ERDJ4* (human) | F R | GGAAGGAGGAGCGCTAGGTC ATCCTGCACCCTCCGACTAC |
| *HSPA5/GRP78* (human) | F R | CATCACGCCGTCCTATGTCG CGTCAAAGACCGTGTTCTCG |
| *HSP90B1/GRP94* (human) | F R | CTGGGACTGGGAACTTATGAATG TCCATATTCGTCAAACAGACCAC |
| *DDIT3/CHOP* (human) | F  R | GGAGAACCAGGAAACGGAAAC  TCTCCTTCATGCGCTGCTTT |
